# Supplementary material for: Transcriptional similarity in couples reveals the impact of shared environment and lifestyle on gene regulation through modified cytosines
Source: PeerJ. 2016 Jun 14;4:e2123. doi: 10.7717/peerj.2123 (PMC4911945; doi:10.7717/peerj.2123)
Supplement: Supplemental Information 1 [file peerj-04-2123-s001.xlsx]

## Sheet: Table1
CpGID	Gene Symbol	Gene Name	Affymetrix ID	pvalue	qvalue	Rsquare	R	Fstat
cg02152034	EMID1	EMI domain containing 1	3941848	1.42e-06	0.0227167	0.363238	-0.602693	29.6632
cg10527635	SNRK	SNF related kinase	2619666	6.71e-06	0.0422763	0.325313	-0.570362	25.0727
cg12001078	MAPKSP1	MAPK Scaffold Protein 1	2779408	8.37e-06	0.0422763	0.31977	-0.565482	24.4448
cg24811472	DPYSL2	dihydropyrimidinase-like 2	3091077	1.06e-05	0.0422763	0.313875	0.560246	23.7879
cg17759595	DPYSL2	dihydropyrimidinase-like 2	3091077	1.33e-05	0.0426203	0.307973	0.554953	23.1415
cg04081402	TCN2	transcobalamin II	3942472	1.7e-05	0.0453522	0.301684	-0.549258	22.4649
cg06545761	ZCCHC14	zinc finger, CCHC domain containing 14	3703665	1.99e-05	0.0455421	0.297584	0.545513	22.0303
Table 1. CpG-Gene expression associations between genes with 'couple effect' and their local CpGs at q-value < 5% level in the YRI samples.

## Sheet: S1
Gene Symbol	Affymetrix ID	Empirical P-value
PARP15	2638988	0
ATP13A1	3855910	0
PFKP	3232349	0.0001
RBM15	2351393	0.0002
SLC38A2	3452323	0.0002
TECR	3822805	0.0002
C1orf97	2378710	0.0003
BNIP3L	3091000	0.0003
MAPK4	3788097	0.0003
EHMT2	2949524	0.0004
RAB21	3422269	0.0005
PIP4K2B	3755359	0.0005
SLC16A10	2921402	0.0007
UBE2R2	3167220	0.0007
FOSB	3836266	0.0007
YEATS2	2655168	0.0008
TULP2	3867493	0.0009
MBP	3814033	0.001
KDM3A	2492064	0.0011
UBXN10	2323899	0.0013
MRPL35	2492015	0.0013
HIST1H4D	2946319	0.0013
BNIP3	3314040	0.0013
FOS	3544525	0.0013
MAGOH	2413180	0.0014
STXBP2	3819016	0.0014
CDK19	2969467	0.0015
CASC3	3720739	0.0015
ERICH1	3121228	0.0018
RHOT2	3643229	0.0018
PPDPF	3893458	0.002
WFDC1	3671695	0.0021
PIK3R2	3824838	0.0021
PPIH	2332711	0.0023
LOC100133299	2802681	0.0023
HHLA1	3153961	0.0024
HIST1H2AK	2947063	0.0027
HIST1H3F	2946364	0.0028
ERH	3570049	0.0028
BSCL2	3376054	0.0029
METTL13	2367287	0.0031
DGCR2	3952453	0.0032
MTCH1	2952102	0.0033
SPTLC3	3876990	0.0033
HADH	2738723	0.0035
B4GALNT1	3458700	0.0035
ZNF500	3678316	0.0035
COX4I2	3881404	0.0035
CYB561D2	2622772	0.0038
PPME1	3340161	0.0038
GANAB	3375951	0.0038
ZNF329	3872733	0.0038
PTPRA	3874023	0.0038
GNAI2	2622638	0.0043
AP4M1	3015241	0.0043
C14orf43	3571553	0.0043
SLC9A3R1	3734453	0.0043
HUS1B	2938321	0.0044
KDM5A	3439603	0.0044
POFUT1	3881786	0.0044
TMEM143	3867065	0.0045
KIAA0907	2437753	0.0046
TMEM115	2675304	0.0046
TUBA1C	3413787	0.0046
DYRK1A	3920566	0.0046
PNRC1	2916716	0.0047
C7orf54	3022689	0.0047
PTTG1	2838201	0.0048
ZNF165	2900195	0.0048
HSD17B7P2	3243262	0.0048
FAM111A	3331926	0.0048
FN1	2526806	0.0049
TCN2	3942472	0.005
RRAGC	2407729	0.0051
TDP1	3548152	0.0051
CCDC97	3834149	0.0051
WDR6	2621917	0.0052
M6PR	3443296	0.0052
TOX4	3528115	0.0053
NEURL4	3743611	0.0053
MCOLN1	3818860	0.0054
MED16	3844822	0.0054
SS18L2	2619323	0.0055
ZNF70	3954866	0.0055
CHPF2	3031967	0.0056
SCYL1	3335267	0.0056
TRIM5	3360622	0.0056
CHMP6	3737647	0.0056
PIH1D1	3867865	0.0056
C19orf59	3819088	0.0057
HECTD1	3559570	0.0058
CCDC109A	3251490	0.0059
TMEM14B	2894711	0.006
GLE1	3190514	0.006
C9orf72	3202421	0.0061
EIF4E2	2532422	0.0063
ZBTB43	3189580	0.0064
VCP	3204404	0.0064
DDIT4	3251393	0.0064
LRCH1	3488602	0.0065
LRCH4	3064082	0.0066
GPAA1	3120021	0.0066
EIF3B	2987441	0.0067
MAPK1IP1L	3536663	0.0067
EPHB2	2324919	0.0069
HTR1B	2961647	0.0069
NAT14	3842264	0.0069
METTL5	2586348	0.007
ATG13	3329404	0.007
SUZ12P	3716664	0.007
FAM36A	2464484	0.0071
SLC38A1	3452231	0.0072
ARMC5	3657168	0.0072
KHSRP	3847814	0.0072
TAS2R20	3444476	0.0074
MED15	3937587	0.0074
ATP5G3	2588127	0.0075
KDM6B	3709153	0.0075
P4HA1	3294159	0.0077
ARHGAP1	3371673	0.0077
PUM2	2542816	0.0078
ALDH9A1	2442103	0.0079
SLC25A31	2742919	0.0081
MAPKSP1	2779408	0.0082
EBAG9	3111695	0.0082
CHMP2A	3872983	0.0082
C2orf7	2559494	0.0083
FOXRED1	3355056	0.0084
PIP4K2C	3418303	0.0086
KCNAB3	3744013	0.0086
CCNG2	2732391	0.0087
OS9	3418436	0.0089
CLRN1	2700933	0.009
C7orf60	3068519	0.009
TSPYL1	2971014	0.0092
DNAJC30	3056211	0.0092
CCNY	3242425	0.0092
CCDC86	3332548	0.0092
HRAS	3358090	0.0092
AMN1	3449910	0.0092
KLB	2724308	0.0093
RAB5C	3757664	0.0093
SUN2	3960827	0.0093
NPPA	2396848	0.0094
TECPR1	3062794	0.0095
DDX50	3250019	0.0096
PHKG2	3656527	0.0096
DHODH	3667811	0.0097
C5orf41	2841491	0.0098
TLE2	3846076	0.0098
SERPINI2	2704114	0.0099
GM2A	2835792	0.0099
ALDH3A1	3748957	0.0099
MKS1	3764199	0.0099
CISH	2675504	0.01
FNTA	3096428	0.0102
EIF4B	3455946	0.0103
SOD1	3917851	0.0103
HMGXB4	3944046	0.0103
TSEN34	3841310	0.0104
FUS	3656904	0.0105
CREB3L3	3817316	0.0105
GTPBP10	3011977	0.0107
TK1	3772158	0.0108
KIAA1033	3429754	0.011
JMJD7-PLA2G4B	3590709	0.011
GOLGA1	3225224	0.0112
SENP5	2659631	0.0113
RRN3	3681705	0.0114
OR11A1	2947805	0.0115
SLC2A1	2409104	0.0117
SIRPB2	3894668	0.0118
TSSC4	3317338	0.0119
RPL36AL	3563357	0.0119
N4BP2L2	3508696	0.012
DHDDS	2326496	0.0122
PFKFB4	2673312	0.0122
FEZ2	2548172	0.0124
FBRS	3656362	0.0124
FBXW5	3230530	0.0125
HNRNPUL1	3834089	0.0125
ABI1	3282016	0.0126
MLX	3721886	0.0126
CDK3	3735364	0.0126
PLA2R1	2583374	0.0127
DTX3	3418329	0.0127
TMEM110	2676471	0.0128
C18orf19	3800070	0.0128
GBA2	3204833	0.0129
C19orf24	3815685	0.0129
ARSG	3732793	0.013
PNPLA6	3818897	0.013
SARS	2350551	0.0131
LY86	2893392	0.0131
HIST1H4C	2899146	0.0131
SC5DL	3352904	0.0131
XRCC6BP1	3418610	0.0132
C14orf1	3572461	0.0132
ANKRD11	3704717	0.0132
PRCC	2361731	0.0133
TMED8	3573029	0.0133
STK36	2527971	0.0135
HS6ST3	3497340	0.0135
ABHD1	2474265	0.0138
GINS3	3663228	0.014
PROSC	3094286	0.0141
PPIE	2331602	0.0142
ARHGAP12	3283920	0.0142
RNH1	3358049	0.0142
VPRBP	2675628	0.0143
VOPP1	3051655	0.0143
KDELR1	3867092	0.0143
DNHD1	3318844	0.0144
TLR6	2766262	0.0146
UBXN6	3846783	0.0146
PFDN2	2440612	0.0147
GLB1	2668205	0.0147
PUF60	3157817	0.0147
FRMD8	3335131	0.0148
MAT2A	2491615	0.0149
COG4	3697125	0.0149
NEDD4L	3789947	0.0149
TEC	2768396	0.015
PLS1	2645906	0.0151
FLJ32154	3913400	0.0151
RICTOR	2854241	0.0152
FNBP4	3372459	0.0152
SMUG1	3456592	0.0152
SIAH1	3690550	0.0152
LLGL1	3713133	0.0152
WDR26	2458082	0.0153
LCN15	3230440	0.0153
C17orf62	3775038	0.0153
HOXA10	3042952	0.0154
HDHD2	3806689	0.0154
SUDS3	3433843	0.0155
SCO1	3745504	0.0155
ZNF827	2788366	0.0156
ZMYND17	3294476	0.0156
DPP3	3336238	0.0156
SLC25A44	2361384	0.0157
ASB3	2553192	0.0157
KIAA0922	2748198	0.0157
SIK2	3348608	0.0157
XKR8	2327338	0.0158
MYLIP	2896484	0.0159
ABCC8	3364878	0.0161
UBE2N	3465791	0.0161
L3MBTL2	3946705	0.0164
ICT1	3734575	0.0165
RHOH	2724671	0.0166
AAAS	3456130	0.0166
MAL2	3113180	0.0168
DNAH3	3683879	0.0168
UCP2	3381817	0.0169
CRCP	3005332	0.0171
DOCK3	2622970	0.0173
NDUFB5	2654069	0.0173
IQSEC1	2663396	0.0173
AFAP1-AS	2717481	0.0174
TUFT1	2358993	0.0175
VEZT	3426828	0.0175
SLC7A11	2786322	0.0176
FBXO42	2398073	0.0177
MED10	2847264	0.0178
SKIV2L	2902884	0.0178
EIF6	3903836	0.0178
PIWIL2	3089316	0.0179
DR1	2347096	0.018
IFT172	2545869	0.018
ATP5S	3535125	0.018
ZNF678	2383550	0.0181
GPR135	3566910	0.0182
IER5	2370355	0.0183
IL12RB1	3854693	0.0184
TMEM81	2452311	0.0185
CRTAC1	3302572	0.0185
SCNN1B	3652902	0.0185
CNTN1	3411721	0.0186
BUD31	3014742	0.0187
SOX10	3960302	0.0187
IFI16	2362394	0.0188
DYNC1LI1	2668035	0.0188
RNF113B	3522101	0.0189
NFIX	3822122	0.0189
CCT7	2488732	0.019
ARF3	3453370	0.019
FLJ42102	3380647	0.0192
NISCH	2623859	0.0193
RNPEPL1	2535830	0.0194
CPSF4	3014764	0.0194
NR3C1	2879312	0.0195
CRYGB	2596975	0.0196
NUFIP2	3751463	0.0196
MECR	2403793	0.0197
C6orf130	2953435	0.0199
RIOK3	3781654	0.0199
CACHD1	2340078	0.02
ACCN4	2528645	0.02
ZSWIM3	3887094	0.0201
CABIN1	3939707	0.0201
RUNX1	3930360	0.0202
CRBN	2660648	0.0203
C9orf3	3180342	0.0203
ZMYM2	3480129	0.0203
CDH7	3792273	0.0204
PHAX	2827156	0.0205
SPTAN1	3190558	0.0205
DENR	3435490	0.0205
ABT1	2899519	0.0206
H3F3B	3770944	0.0207
PPIB	3628994	0.0208
ZNF169	3180212	0.0209
CREBZF	3385003	0.0209
COX7A2L	2550122	0.021
C12orf52	3432641	0.0211
PRAMEF1	2321040	0.0212
GGT5	3955185	0.0212
CRYGC	2596955	0.0214
CLK2	2437329	0.0216
NPR2	3168160	0.0216
SLC26A6	2673547	0.0217
GCC1	3071285	0.0217
EEA1	3465593	0.0217
CHD9	3691906	0.0217
GPRIN1	2888385	0.0219
DAZAP2	3414846	0.0219
ARHGEF16	2317246	0.022
CLUAP1	3645947	0.022
C18orf8	3781734	0.022
NR1I3	2440744	0.0222
HIST1H4B	2946208	0.0222
PCBP1	2487639	0.0223
JRK	3157060	0.0225
MGEA5	3304012	0.0225
SLC25A45	3377569	0.0225
ABCG2	2777276	0.0226
TM9SF1	3557898	0.0226
GDI2	3275132	0.0227
MZF1	3873017	0.0227
GLYR1	3678395	0.0228
KRTAP15-1	3917563	0.0228
HBP1	3018420	0.023
ASH2L	3094447	0.023
CCDC135	3662876	0.023
DDX17	3960629	0.0231
PPP2R4	3190939	0.0232
TCP1	2982381	0.0233
TCIRG1	3337390	0.0233
CPNE3	3105904	0.0234
MTHFSD	3703408	0.0234
HIAT1	2348757	0.0235
C11orf49	3329537	0.0236
STARD7	2565143	0.0238
ATP2A3	3741800	0.0238
KRTAP2-4	3756723	0.0238
SSR2	2437871	0.0241
NMUR1	2603544	0.0241
ST6GALNAC4	3226181	0.0241
IRF3	3867980	0.0241
WDR1	2760371	0.0242
MRPS18C	2734018	0.0243
TMEM179B	3333668	0.0243
KRT73	3455674	0.0244
ATP5O	3929931	0.0244
HIRA	3952637	0.0244
C22orf13	3955327	0.0244
GADD45B	3816509	0.0245
DOM3Z	2949588	0.0246
SNRK	2619666	0.0247
GTPBP2	2954771	0.0247
PLIN5	3846831	0.0247
AGTR1	2647015	0.0249
DOLPP1	3190925	0.0249
GGA3	3770663	0.0249
UNC5B	3250990	0.025
PLOD1	2320581	0.0252
HCST	3830993	0.0252
FAM136A	2558595	0.0253
EIF4H	3008144	0.0254
MEN1	3377149	0.0254
PKM2	3631964	0.0254
SHOC2	3264004	0.0256
EMID1	3941848	0.0256
SNX4	2693149	0.0257
LUC7L3	3726772	0.0257
CNTD2	3862452	0.0257
CNST	2389718	0.0258
FBXW8	3433591	0.0258
C14orf93	3557017	0.0258
SMOC2	2937144	0.0259
C1orf52	2420790	0.0261
CES2	3664982	0.0261
RCE1	3336554	0.0262
C19orf43	3851703	0.0262
PWP2	3923498	0.0262
ILVBL	3853063	0.0263
MAD2L2	2396781	0.0264
MS4A14	3332334	0.0264
TMBIM6	3414186	0.0264
EFTUD2	3759356	0.0264
RNF167	3707352	0.0266
LZTR1	3937847	0.0266
SRA1	2878347	0.0268
WHSC2	2757540	0.0269
C16orf58	3688424	0.0269
GOLGA3	3479355	0.027
ZNF573	3861064	0.0271
CLCN6	2320472	0.0272
RASSF7	3315952	0.0272
OGDH	2999948	0.0273
SPATA1	2344577	0.0274
CCBP2	2619480	0.0274
UTP23	3112543	0.0274
CLDN9	3645549	0.0274
CFDP1	3699508	0.0274
VPS53	3739668	0.0277
STK4	3886704	0.0277
ARSA	3966143	0.0278
PRDM9	2804221	0.0279
FAM108B1	3209497	0.0279
AP2B1	3718682	0.028
NSAP11	3088048	0.0281
TSPAN10	3738081	0.0281
HIVEP3	2408681	0.0282
FAM104A	3769969	0.0282
ZNF330	2745220	0.0283
SLC6A10P	3688878	0.0283
ACP1	2466141	0.0285
PHLDB2	2635895	0.0286
CHP	3590341	0.0286
PIN1	3820177	0.0286
SSU72	2391647	0.0287
CATSPERG	3832308	0.0287
TTC38	3949017	0.0287
GNB1	2391840	0.0288
PRCP	3384270	0.0288
MESDC1	3604236	0.0288
TXLNA	2328713	0.0289
YTHDF2	2327630	0.0291
CBX8	3773149	0.0291
B4GALT3	2440664	0.0292
CHCHD3	3073597	0.0292
FAM168A	3381540	0.0294
TRA2A	3041550	0.0296
CPO	2524817	0.0297
PSMB10	3696016	0.0297
KLF15	2693511	0.0298
PROS1	2685304	0.0299
C16orf47	3698422	0.0299
CHURC1	3540353	0.0302
CALM3	3836841	0.0302
APOM	2902531	0.0303
RELA	3377789	0.0303
C12orf42	3468610	0.0303
ADNP2	3795501	0.0303
ACAD9	2641341	0.0304
GZF1	3880191	0.0304
CLCNKA	2322226	0.0305
PICK1	3945180	0.0305
TGFBRAP1	2568630	0.0306
CSGALNACT2	3243908	0.0306
MAB21L1	3509411	0.0306
KIAA1267	3760137	0.0307
KRTAP10-7	3923850	0.0307
SMARCC1	2672857	0.0308
ENDOU	3452664	0.0308
MRPL4	3820414	0.0308
TTLL5	3544678	0.0309
PRKCSH	3821200	0.031
CDV3	2643157	0.0311
MRPL42	3426215	0.0311
SRFBP1	2826064	0.0312
LRRC8C	2345929	0.0313
TRIM33	2429069	0.0313
CCDC71	2674138	0.0313
ZMIZ2	3000010	0.0314
RNF185	3942805	0.0314
GPATCH3	2402861	0.0316
ABHD14B	2675836	0.0317
FERMT3	3334257	0.0317
RAD51L1	3541497	0.0317
PRKAG1	3453556	0.0318
SRSF1	3764103	0.0318
ZFAND3	2905664	0.0319
NUBPL	3531355	0.0319
ABCD4	3571810	0.0319
VMO1	3742304	0.0319
SELT	2647792	0.032
NDUFS8	3337360	0.032
EARS2	3685261	0.032
ASB14	2677922	0.0321
FSIP2	2519079	0.0323
C4orf22	2733392	0.0323
BRIX1	2806231	0.0324
SRF	2907730	0.0324
SLC6A12	3439510	0.0324
CXCL5	2773369	0.0326
YY1	3551677	0.0326
MFNG	3960110	0.0326
PRKCD	2624291	0.0327
LYVE1	3362826	0.0327
TACR1	2560524	0.0329
SP3	2587520	0.0329
NSUN5P2	3055703	0.033
MRPL27	3762339	0.033
TANK	2512601	0.0331
SPRYD3	3455973	0.0331
NUDCD3	3048631	0.0332
CCND1	3380065	0.0332
CD58	2429842	0.0333
MAF1	3120066	0.0333
HK1	3250278	0.0333
SPHK2	3837895	0.0333
FLJ14107	3127579	0.0334
DNASE2	3851826	0.0335
CRELD2	3950452	0.0335
PDHB	2678367	0.0336
SI	2703750	0.0336
ZC3H8	2571217	0.0339
FLJ39653	2719792	0.0339
LMNB2	3845909	0.0339
NDUFA11	3847515	0.0341
ATF4	3945914	0.0341
POLL	3303870	0.0342
TMEM127	2565246	0.0343
DNAJB13	3340116	0.0343
SDHB	2398789	0.0344
KIAA1967	3089597	0.0345
ELF5	3369117	0.0345
C14orf138	3563687	0.0345
TMED6	3696554	0.0345
ACD	3695786	0.0346
MRPL17	3361116	0.0348
DLST	3544346	0.0348
SBNO2	3844978	0.0348
ZNF131	2808290	0.035
CD19	3655109	0.035
CDK2AP1	3476097	0.0353
USP25	3915087	0.0353
KLHL22	3953556	0.0353
ELK4	2452571	0.0354
VPS26A	3250168	0.0356
EXOC4	3025005	0.0357
HERC4	3292448	0.0357
RBM16	2932360	0.0359
POP5	3474619	0.0359
DPYSL2	3091077	0.036
TESK1	3167994	0.0361
ADNP	3909354	0.0361
SNX10	2993727	0.0362
RPF2	3883542	0.0362
C22orf32	3947310	0.0362
NDUFS2	2363525	0.0363
HIST1H4L	2947081	0.0363
ESYT2	3082248	0.0363
TNF	2902416	0.0364
PWP1	3430552	0.0364
LMAN2	2888698	0.0365
LDLR	3821015	0.0365
ZNF84	3439305	0.0366
C2orf49	2498046	0.0367
JARID2	2896177	0.0367
C7orf27	3035795	0.0367
MYBL2	3886223	0.0367
RPF1	2344542	0.0368
CRK	3740171	0.0368
YWHAQ	2539869	0.0369
SPATA7	3547500	0.037
GCFC1	3929395	0.037
CRCT1	2359302	0.0371
HMG20B	3817040	0.0371
OCIAD2	2768654	0.0373
HNRNPA0	2877141	0.0373
FLJ32955	2580699	0.0374
SERPINA10	3577577	0.0374
ZCCHC14	3703665	0.0374
HMGCS1	2855501	0.0375
AKR1A1	2334374	0.0376
KIAA1797	3164601	0.0376
CDH13	3671202	0.0376
PLK3	2334191	0.0377
KIAA0232	2717101	0.0377
ZNF384	3442205	0.0379
HCFC1R1	3677356	0.0379
DPP9	3846926	0.0379
ZFP36L1	3569754	0.038
OAZ1	3816380	0.038
SYNCRIP	2963407	0.0381
DMRT2	3159754	0.0381
PPM1G	2545811	0.0382
GTPBP8	2636272	0.0382
EXOC3	2798679	0.0382
PPP6C	3225348	0.0382
ELOVL5	2957596	0.0383
KLC3	3836217	0.0383
AVPI1	3302495	0.0384
C11orf59	3380980	0.0385
LY86-AS	2940258	0.0386
TMEM192	2792420	0.0387
TRIO	2802398	0.0387
SH3GLB2	3226804	0.0387
RP9P	3044938	0.0388
METAP2	3426917	0.0388
PDIK1L	2326286	0.0389
C1orf89	2398040	0.0389
SENP2	2656230	0.0389
GALK1	3770923	0.039
SYNPO2L	3294668	0.0391
MYL3	2672442	0.0392
CBFA2T3	3704567	0.0393
SLC16A3	3738629	0.0394
CNBP	2694644	0.0395
B4GALT2	2333678	0.0397
CD72	3204648	0.0397
C12orf24	3431553	0.0397
ZIC2	3498780	0.0398
LMAN1L	3601889	0.0399
C16orf42	3675815	0.0399
ZNF701	3840372	0.04
ACTA1	2459837	0.0401
EPSTI1	3511698	0.0401
NPEPL1	3891048	0.0401
PGLYRP2	3853495	0.0402
AFF4	2875555	0.0404
MCM8	3875195	0.0404
DMWD	3865679	0.0405
CRABP2	2438458	0.0406
TMEM44	2711751	0.0407
CLPB	3381063	0.0408
ZNF410	3543884	0.0408
IDH2	3638760	0.0408
DNAI1	3167427	0.0409
SMARCC2	3457455	0.041
ENOSF1	3795866	0.0411
TMEM222	2326954	0.0412
PHGDH	2354634	0.0412
CHD1L	2356721	0.0412
RAC1	2989050	0.0412
TBCK	2780734	0.0413
B3GNT4	3435267	0.0413
C19orf10	3846900	0.0414
TNFAIP6	2510464	0.0415
ODF2	3190463	0.0417
ZDHHC24	3378320	0.0417
ZNF416	3872335	0.0418
KDM4C	3161566	0.0419
KIF2B	3727344	0.0419
GALNT2	2384788	0.042
TMEM140	3025740	0.0421
KRT84	3455326	0.0421
ACOX1	3771215	0.0421
ZZZ3	2419046	0.0422
C6orf125	2950798	0.0422
TRAF3IP2	2969810	0.0422
DENND4C	3164221	0.0422
GUCY2D	3709384	0.0422
CRTC1	3825292	0.0422
CTSD	3358950	0.0423
OIT3	3251566	0.0424
NPEPPS	3724698	0.0424
MOBKL2A	3845681	0.0424
TCF15	3894288	0.0424
HP1BP3	2400322	0.0425
PARP14	2639054	0.0425
BCL7B	3056108	0.0425
RN28S1	3341440	0.0426
CBFA2T2	3882533	0.0426
TRIP6	3015911	0.0427
C9orf24	3203996	0.0427
EEF1B2	2524577	0.0428
PSD4	2501238	0.0431
FAM162A	2638886	0.0432
SLX4	3677702	0.0432
2015-03-02	3819522	0.0432
SUPT6H	3715703	0.0434
BPTF	3732448	0.0434
WDR12	2595443	0.0435
PLRG1	2790570	0.0435
RAB18	3240095	0.0435
ZNF277	3019401	0.0436
C17orf50	3718775	0.0436
ZNF671	3872398	0.0436
TMPRSS11E	2729821	0.0438
PAQR3	2774817	0.0438
COX6C	3146433	0.0439
POLR2F	3945133	0.0439
TXNRD2	3952880	0.0439
CEP72	2798777	0.044
SLC7A13	3143282	0.044
SPATA5L1	3592366	0.044
LOC286359	3216813	0.0441
SERTAD1	3862640	0.0443
HIF1A	3539070	0.0444
SLC44A3	2347625	0.0446
ATP5A1	3806253	0.0446
PDIA6	2540317	0.0447
ENTPD6	3880706	0.0447
ERVFRDE1	2941757	0.0448
TSC22D2	2647647	0.0449
DNMT3A	2544662	0.0451
SLED1	2796623	0.0451
LETMD1	3414776	0.0451
CCDC90A	2942578	0.0452
S1PR5	3850406	0.0453
CECR5	3951732	0.0453
DUXA	3872138	0.0454
ATG9B	3079257	0.0456
CDH26	3891664	0.0456
C22orf46	3947011	0.0457
WDSUB1	2582979	0.0459
CLK1	2594497	0.0459
UCP1	2787073	0.0459
CSRP1	2450865	0.046
UGT2B7	2729929	0.046
RNF146	2924898	0.046
KIAA0415	2988336	0.046
NIP7	3666686	0.046
CSNK2B	2902559	0.0461
SPPL2B	3816424	0.0461
ZNF740	3415812	0.0462
TMEM104	3734479	0.0463
TBC1D9B	2890326	0.0464
SLAMF6	2440258	0.0465
LOC100130691	2588889	0.0465
GSN	3187686	0.0465
CSTF3	3368520	0.0465
POU2AF1	3390860	0.0465
TBC1D15	3422326	0.0467
SEC13	2662657	0.0468
SCAMP2	3633148	0.0469
C14orf156	3545525	0.047
RPL13	3674146	0.0471
NAE1	3695268	0.0471
HMOX1	3944129	0.0471
TNIP1	2881672	0.0472
QRFP	3227454	0.0473
LIG1	3866898	0.0473
ISY1	2694617	0.0474
ZNF607	3861037	0.0474
GGNBP2	3719161	0.0475
CCNG1	2838598	0.0477
MYST3	3133135	0.0477
ACVRL1	3415109	0.0478
ARF5	3022409	0.0479
SLC35E1	3854000	0.0479
DMGDH	2864118	0.048
TYROBP	3860137	0.048
TTC17	3327948	0.0482
KDM2A	3336696	0.0484
RPS15	3815726	0.0484
ZNF787	3871730	0.0484
NUCKS1	2452637	0.0485
C10orf11	3252690	0.0486
RAD23A	3822074	0.0486
ZNF526	3834651	0.0487
NCAM1	3349293	0.0488
WDR60	3034449	0.0489
CHTF18	3643431	0.0489
RABGGTB	2342624	0.049
GPR161	2442911	0.049
MLF2	3442282	0.049
GBE1	2684187	0.0491
EEF1A1	2960903	0.0491
GUCA1A	2907066	0.0492
HCRP1	2907173	0.0492
COMTD1	3295331	0.0492
C12orf66	3459956	0.0492
BTN3A2	2899298	0.0493
KCNK17	2952893	0.0494
C22orf34	3965102	0.0494
ISG20	3607275	0.0495
CANT1	3772775	0.0495
GJB4	4054427	0.0495
WLS	2417390	0.0497
SULT1A2	3654669	0.0497
HIST1H2BG	2946345	0.0499
CLASRP	3835983	0.0499
Supplemental Table S1. All results at 5% empirical p-value for couple effect of 778 genes.

## Sheet: S2
TFBS Name	Gene Counts	Benjamini
PAX5	455	2.1e-10
ELK1	405	1.4e-09
AHRARNT	417	2.1e-08
USF	456	5e-08
MYOGNF1	377	8.2e-08
CETS1P54	220	1.8e-07
NRF2	253	2.1e-07
HEN1	448	5.4e-07
MZF1	376	2.4e-06
NRSF	409	3.9e-06
SP1	208	9.4e-06
AP4	479	1e-05
TAXCREB	409	1.1e-05
P53	487	1.2e-05
OLF1	349	1.2e-05
XBP1	377	1.3e-05
YY1	514	1.3e-05
NGFIC	240	1.6e-05
CREBP1	360	1.7e-05
COMP1	377	1.8e-05
NMYC	251	2.7e-05
AHR	265	2.8e-05
ARNT	359	3.4e-05
ATF6	348	3.5e-05
ZID	359	3.6e-05
RREB1	298	3.6e-05
ROAZ	345	5.4e-05
ATF	249	7.7e-05
PPARG	586	9.6e-05
GRE	355	0.0001
P300	288	0.0001
AREB6	602	0.00014
MIF1	318	0.00014
NFY	360	0.00024
SPZ1	246	0.00033
CREB	319	0.00034
MAZR	171	0.00039
CMYB	317	0.0004
CP2	295	0.00042
MYCMAX	452	0.00044
NFKAPPAB	268	0.00046
PAX2	424	0.00047
STAT1	296	0.00058
AP2REP	330	0.00061
E2F	412	0.00065
STAT3	346	0.00075
AP2	195	0.0011
PAX4	550	0.0012
CDPCR3HD	326	0.0016
MYOD	401	0.0019
IK2	226	0.0021
GATA2	255	0.0021
PPARA	390	0.0022
HNF4	345	0.0034
SRF	496	0.0037
GATA1	566	0.0039
RFX1	435	0.0042
SEF1	362	0.005
ZIC2	177	0.006
PAX3	312	0.0071
NFKB	353	0.0072
MAX	134	0.0083
AML1	539	0.0089
TCF11	358	0.0095
Supplemental Table S2. Transcription factor binding sites (TFBS) were detected to be associated with 778 'couple effect' genes at Benjamini adjusted p-value < 1%.
Gene Counts represent the number of genes in 778 'couple effect' genes.

## Sheet: S3
CpGID	Gene Symbol	Affymetrix ID	pvalue
cg19750321	ARNT	2434633	0.00114828
cg14172603	PAX5	3205293	0.00556933
cg10715699	RREB1	2893562	0.0101612
cg06671450	PAX5	3205293	0.0118834
cg07795513	ATF6	2363919	0.0129125
cg18255813	RREB1	2893562	0.0157873
cg07183447	PAX2	3260700	0.018344
cg19717150	HNF4	3886453	0.023092
cg18891127	MAX	3568667	0.0247053
cg25857307	STAT3	3757840	0.0255487
cg00944785	ARNT	2434633	0.0258721
cg13914024	USF	2440523	0.0272708
cg02422902	PAX5	3205293	0.0304224
cg02486259	PAX5	3205293	0.0346737
cg12873903	STAT3	3757840	0.0348965
cg12597169	PAX3	2600881	0.0352225
cg14559259	PAX3	2600881	0.0376418
cg16221969	HNF4	3886453	0.0387781
cg03862380	HNF4	3886453	0.0397463
cg13979394	MAX	3568667	0.0400375
cg21885864	ZIC2	3498780	0.0430838
cg02728629	MYOD	3322501	0.0433899
cg26228696	ARNT	2434633	0.0435895
cg10116181	PAX2	3260700	0.0446284
cg25962735	ZIC2	3498780	0.0448906
cg01790894	PAX3	2600881	0.0457167
cg12648759	ATF6	2363919	0.0492636
Supplemental Table S3. CpG-Gene expression associations between TF genes and their local CpGs at p-value < 5% level in the YRI samples.
